# Supplementary material for: Comparative acute effects of mescaline, lysergic acid diethylamide, and psilocybin in a randomized, double-blind, placebo-controlled cross-over study in healthy participants
Source: PubMed Central journal article supplement (PMC10517157; doi:10.1038/s41386-023-01607-2), 2023-05-25

# STUDY

Mescaline: 300, 500 mg  
LSD: 100 µg  
Psilocybin: 20 mg  
Placebo

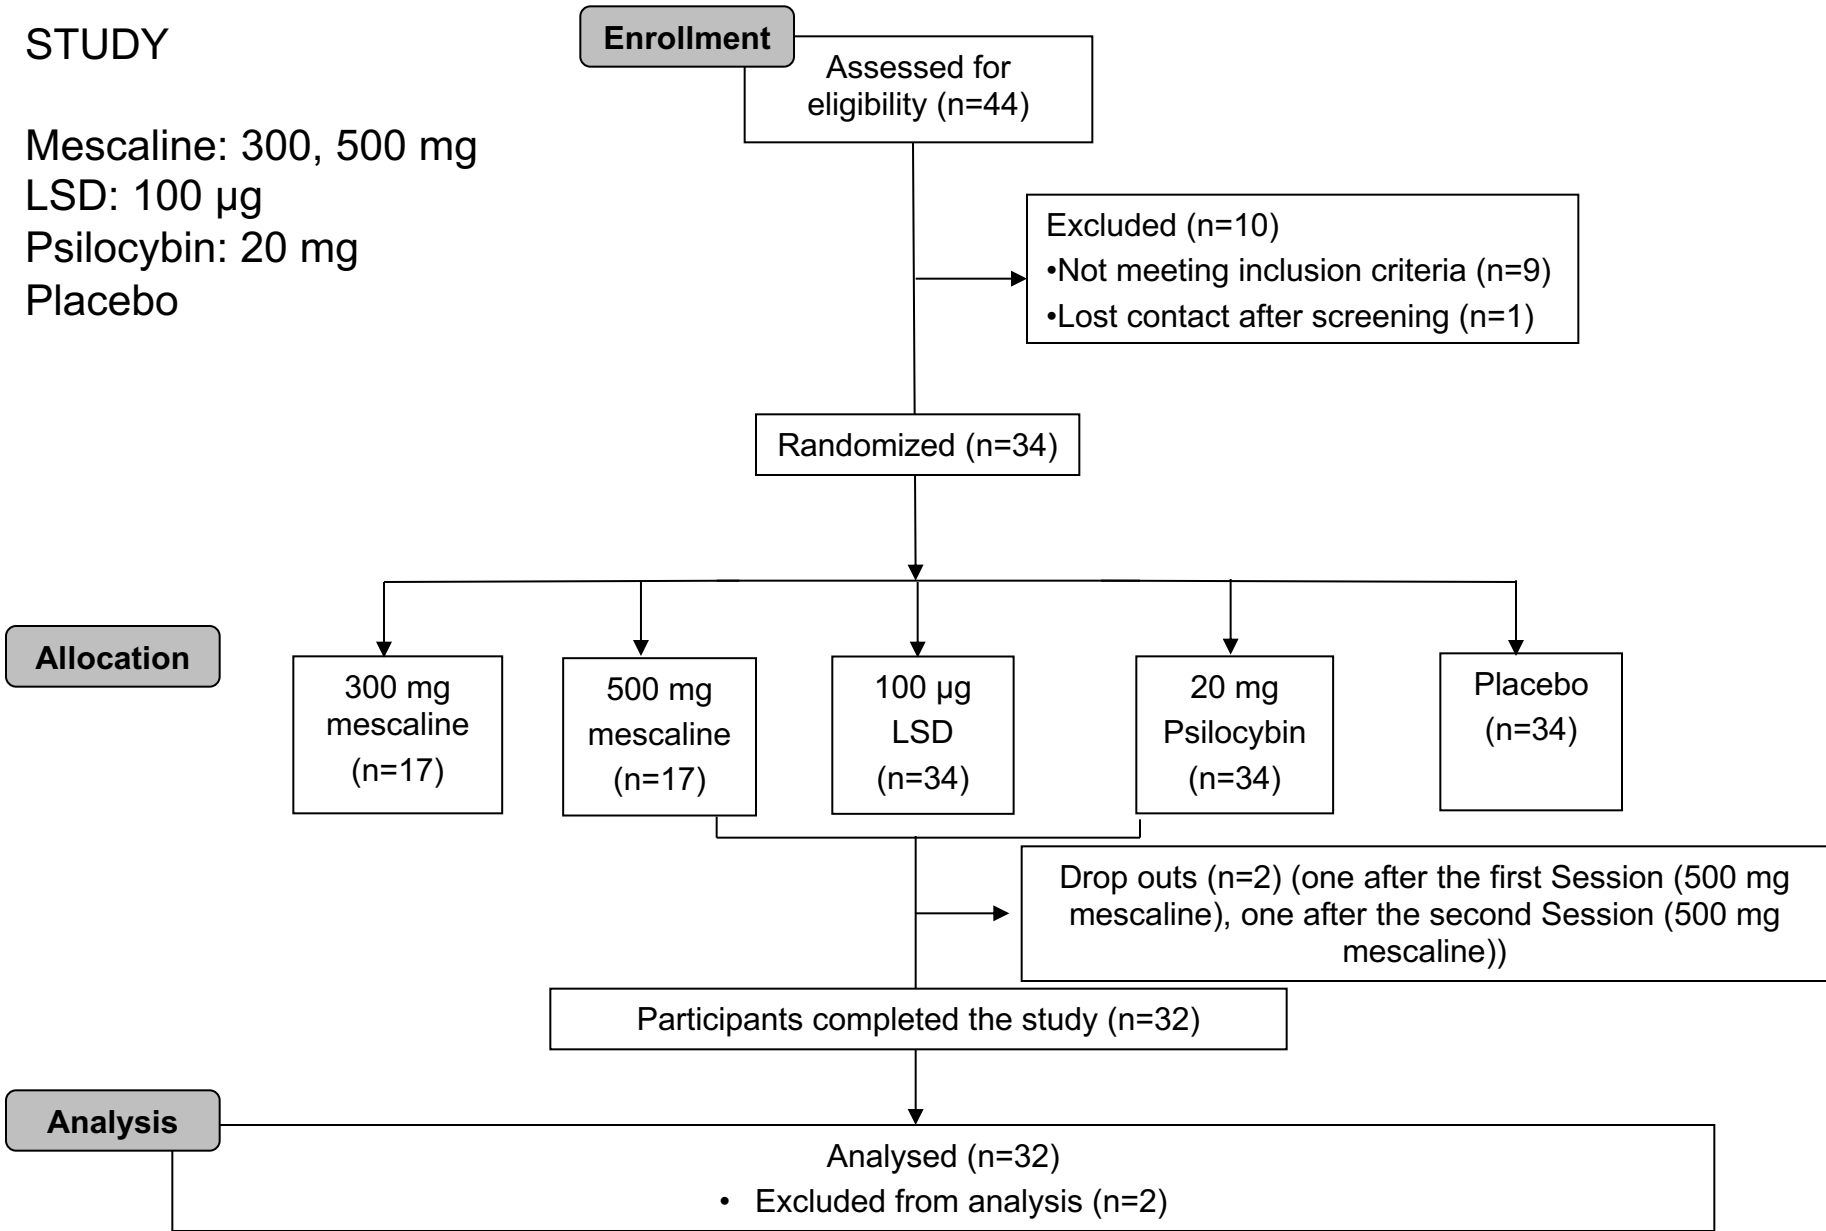

Supplement: 41386_2023_1607_MOESM2_ESM.pdf [file 41386_2023_1607_MOESM2_ESM.pdf]
